# Supplementary material
Source: MDPI journal article supplement (https://www.mdpi.com/1999-4907/14/10/2085)
Supplement: s1 [file s1]

# Responses of Stream Water Temperature to Water Levels in Forested Catchments of South Korea

Sooyoun Nam, Honggeun Lim, Byoungki Choi, Qiwen Li, Haewon Moon and Hyung Tae Choi \*

## Supplementary Materials

**Table S1.** Summary of observed sites in forested catchments.

| Site | Location       | Latitude | Longitude | Area (ha) | Underlying geology | Altitude (m) | Slope gradients (°)* | Forest type        |
|------|----------------|----------|-----------|-----------|--------------------|--------------|----------------------|--------------------|
| C1   | Gyeonggi-do    | 37°34'N  | 127°32'E  | 13.2      | Metamorphic rock   | 681–1009     | 31.2                 | Broadleaved forest |
| C2   | Chungcheong-do | 36°38'N  | 127°40'E  | 15.0      | Sedimentary rock   | 303–545      | 27.0                 | Mixed forest       |
| C3   | Gyeongsang-do  | 35°59'N  | 128°44'E  | 18.5      | Igneous rock       | 494–716      | 25.0                 | Broadleaved forest |
| C4   | Gyeonggi-do    | 37°17'N  | 127°17'E  | 34.3      | Metamorphic rock   | 260–637      | 34.2                 | Broadleaved forest |
| C5   | Gangwon-do     | 37°28'N  | 128°30'E  | 40.6      | Sedimentary rock   | 960–1368     | 27.0                 | Broadleaved forest |
| C6   | Jeolla-do      | 35°09'N  | 127°10'E  | 40.7      | Metamorphic rock   | 326–765      | 29.9                 | Broadleaved forest |
| C7   | Gyeongsang-do  | 36°17'N  | 128°53'E  | 46.2      | Sedimentary rock   | 386–600      | 29.8                 | Mixed forest       |
| C8   | Gyeonggi-do    | 37°34'N  | 127°31'E  | 47.0      | Metamorphic rock   | 546–919      | 20.4                 | Coniferous forest  |
| C9   | Jeolla-do      | 35°38'N  | 127°35'E  | 56.5      | Metamorphic rock   | 745–1235     | 34.9                 | Broadleaved forest |
| C10  | Gyeongsang-do  | 35°20'N  | 127°53'E  | 59.0      | Igneous rock       | 495–1000     | 32.0                 | Broadleaved forest |
| C11  | Gyeongsang-do  | 35°03'N  | 128°49'E  | 101.8     | Metamorphic rock   | 861–1340     | 31.2                 | Broadleaved forest |
| C12  | Gyeongsang-do  | 35°00'N  | 129°12'E  | 103.0     | Metamorphic rock   | 472–915      | 28.9                 | Mixed forest       |
| C13  | Gangwon-do     | 37°58'N  | 128°22'E  | 105.6     | Igneous rock       | 490–845      | 32.8                 | Mixed forest       |
| C14  | Jeolla-do      | 35°44'N  | 127°28'E  | 106.8     | Metamorphic rock   | 511–1003     | 30.4                 | Broadleaved forest |
| C15  | Gangwon-do     | 37°14'N  | 128°09'E  | 167.1     | Metamorphic rock   | 435–900      | 24.9                 | Mixed forest       |

|                  |                |         |          |       |                  |          |      |                    |
|------------------|----------------|---------|----------|-------|------------------|----------|------|--------------------|
| <sup>8</sup> C16 | Jeolla-do      | 35°06'N | 127°35'E | 169.1 | Metamorphic rock | 640–1149 | 28.0 | Broadleaved forest |
| C17              | Jeolla-do      | 35°44'N | 127°38'E | 191.8 | Igneous rock     | 570–1065 | 30.4 | Mixed forest       |
| C18              | Gangwon-do     | 37°56'N | 128°40'E | 198.4 | Metamorphic rock | 210–600  | 27.3 | Mixed forest       |
| C19              | Gangwon-do     | 38°04'N | 128°22'E | 199.2 | Igneous rock     | 580–1155 | 29.6 | Mixed forest       |
| C20              | Chungcheong-do | 36°38'N | 127°54'E | 208.9 | Igneous rock     | 325–901  | 27.7 | Mixed forest       |
| C21              | Gangwon-do     | 37°27'N | 128°29'E | 219.2 | Sedimentary rock | 627–1190 | 23.4 | Mixed forest       |
| C22              | Gangwon-do     | 38°02'N | 127°28'E | 281.4 | Igneous rock     | 430–915  | 27.6 | Mixed forest       |

Note: The observed 22 sites are conducted in two catchment categories, including catchment areas less than and or equal to 100 ha ( $FC_{\leq 100}$ ) and catchment areas over 100 ha ( $FC_{>100}$ ).  $FC_{\leq 100}$  and  $FC_{>100}$  are included from C1 to C10 and C11 to C22, respectively. Asterisk (\*) indicates the mean value of dominant slope gradients.

9  
10  
11
